# Supplementary material for: Variation in fisher skill is a major determinant of bycatch rates across species, gears, and fisheries
Source: Research Square preprint supplement (doi:10.21203/rs.3.rs-605785/v1), 2021-07-23
Supplement: Supplementary file 1 [file 2da548d28cdb39917522576e.docx]

# **Supplementary Information**


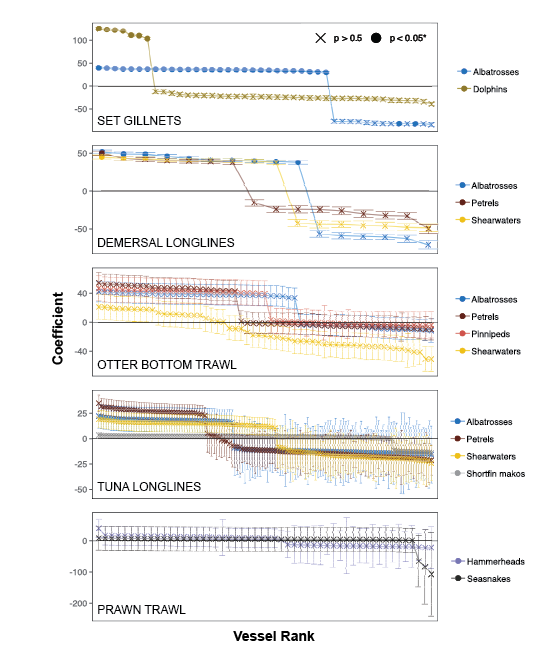


Supplementary Figure 1: Regression coefficients for individual vessels (as a fixed effect) in the 15 models where vessel was significant. Coefficients are calculated using deviation contrasts instead of the default treatment contrasts, and ordered by descending coefficient value for each species. Error bars show the cube root of the standard error estimate for each regression coefficient. Round dots show significant (p<0.05) regression coefficients and crosses show *p-*values > 0.05. The only significant coefficients are in the set gillnet and demersal longline fisheries.

Table S1: Estimated parameters for parametric coefficients, smoothed effects, and fixed effects for the best model for the 16 species-fishery interactions. Perc. in light = Percent of shot duration in daylight. Depth= depth of fishing gear (either a min or max depth depending on the fishery). All models included an effort offset. "Importance" is estimated by the dredge function.

| **TUNA LONGLINES (ETBF)** | | | | | | | |
| --- | --- | --- | --- | --- | --- | --- | --- |
| **Shortfin makos (ETBF)** | | |  |  |  |  |  |
|  | **Coefficients** | **Term** | **Estimate** | **Std. Error** | **t value** | **Pr(>|t|)** | **Importance** |
|  |  | Intercept | -1.04E+00 | 7.95E-02 | -13.139 | < 2e-16 |  |
|  |  | Target catch | 1.67E-03 | 2.64E-04 | 6.321 | 2.88E-10 | 1.0000 |
|  | **Smoothed terms** |  | **Est. df** | **Ref df** | ***F*** | ***P-*value** |  |
|  |  | s(Year) | 8.9068 | 8.997 | 39.188 | < 0.001 | 1.0000 |
|  |  | s(Month) | 9.0796 | 10 | 43.630 | < 0.001 | 1.0000 |
|  |  | s(Lat, Lon) | 1.9941 | 2 | 419.223 | < 0.001 | 1.0000 |
|  |  | s(Perc. in light) | 8.1137 | 8.7745 | 26.015 | < 0.001 | 1.0000 |
|  |  | s(Shot duration) | 7.382 | 8.3485 | 8.271 | < 0.001 | 1.0000 |
|  | **Fixed Effects** |  |  |  |  |  |  |
|  |  | Target cluster |  |  |  |  | 1.0000 |
|  |  | Vessel |  |  |  |  | 1.0000 |
|  |  | Operation type |  |  |  |  | 1.0000 |
|  | **Summary stats** | **Deviance explained** | | **Num. observations** | |  |  |
|  |  | 25.30% |  | 4242 |  |  |  |
|  |  |  |  |  |  |  |  |
| **Shearwaters (ETBF)** | |  |  |  |  |  |  |
|  | **Coefficients** | **Term** | **Estimate** | **Std. Error** | **t value** | **Pr(>|t|)** | **Importance** |
|  |  | Intercept | -5.90E+00 | 1.08051 | -5.462 | 4.98E-08 |  |
|  | **Smoothed terms** |  | **Est. df** | **Ref df** | ***F*** | ***P-*value** |  |
|  |  | s(Year) | 2.65 | 3.3369 | 46.007 | < 0.001 | 1.0000 |
|  |  | s(Month) | 7.8977 | 10 | 43.916 | < 0.001 | 1.0000 |
|  |  | s(Lat, Lon) | 1.9267 | 2 | 67.845 | < 0.001 | 1.0000 |
|  |  | s(Perc. in light) | 3.4626 | 4.2049 | 23.194 | < 0.001 | 1.0000 |
|  |  | s(Vessel) | 57.4526 | 133 | 2.714 | < 0.001 | 1.0000 |
|  | **Fixed Effects** |  |  |  |  |  |  |
|  |  | Target cluster |  |  |  |  | 0.3995 |
|  |  | Operation type |  |  |  |  | 0.9997 |
|  | **Summary stats** | **Deviance explained** | | **Num. observations** | |  |  |
|  |  | 82.50% |  | 4242 |  |  |  |
|  |  |  |  |  |  |  |  |
| **Petrels (ETBF)** | |  |  |  |  |  |  |
|  | **Coefficients** | **Term** | **Estimate** | **Std. Error** | **t value** | **Pr(>|t|)** | **Importance** |
|  |  | Intercept | -9.78901 | 2.51329 | -3.895 | 9.98E-05 |  |
|  | **Smoothed terms** |  | **Est. df** | **Ref df** | ***F*** | ***P-*value** |  |
|  |  | s(Year) | 3.8934 | 4.6854 | 17.364 | < 0.001 | 1.0000 |
|  |  | s(Month) | 5.4927 | 10 | 42.038 | < 0.001 | 1.0000 |
|  |  | s(Lat, Lon) | 1.4714 | 2 | 17.731 | 0.021 | 0.5513 |
|  |  | s(Perc. in light) | 2.1926 | 2.63 | 13.318 | < 0.001 | 0.9984 |
|  |  | s(Vessel) | 47.0819 | 133 | 1.666 | < 0.001 | 1.0000 |
|  | **Fixed Effects** |  |  |  |  |  |  |
|  |  | Operation type |  |  |  |  | 0.4212 |
|  | **Summary stats** | **Deviance explained** | | **Num. observations** | |  |  |
|  |  | 84.10% |  | 4242 |  |  |  |
|  |  |  |  |  |  |  |  |
| **Albatrosses (ETBF)** | |  |  |  |  |  |  |
|  | **Coefficients** | **Term** | **Estimate** | **Std. Error** | **t value** | **Pr(>|t|)** | **Importance** |
|  |  | Intercept | -5.0356 | 0.4426 | -11.376 | <2e-16 |  |
|  | **Smoothed terms** |  | **Est. df** | **Ref df** | ***F*** | ***P-*value** |  |
|  |  | s(Year) | 1 | 1 | 58.142 | < 0.001 | 1.0000 |
|  |  | s(Month) | 5.915 | 10 | 6.175 | < 0.001 | 1.0000 |
|  |  | s(Lat, Lon) | 1.7986 | 2 | 50.694 | < 0.001 | 1.0000 |
|  |  | s(Perc. in light) | 2.2447 | 2.6794 | 16.752 | < 0.001 | 0.9999 |
|  |  | s(Vessel) | 29.4666 | 133 | 0.652 | < 0.001 | 0.7531 |
|  | **Fixed Effects** |  |  |  |  |  |  |
|  |  | Operation type |  |  |  |  | 0.7289 |
|  | **Summary stats** | **Deviance explained** | | **Num. observations** | |  |  |
|  |  | 52.30% |  | 4242 |  |  |  |
|  |  |  |  |  |  |  |  |
| **PRAWN TRAWL (NPF)** | | | | | | | |
| **Sea snakes (NPF)** | |  |  |  |  |  |  |
|  | **Coefficients** | **Term** | **Estimate** | **Std. Error** | **t value** | **Pr(>|t|)** | **Importance** |
|  |  | Intercept | -5.26E+00 | 4.45E-01 | -11.820 | < 2e-16 |  |
|  |  | Target catch | -2.33E-05 | 6.37E-06 | -3.660 | 0.00026 | 1.0000 |
|  | **Smoothed terms** |  | **Est. df** | **Ref df** | ***F*** | ***P-*value** |  |
|  |  | s(Year) | 8.2682 | 8.8556 | 34.596 | < 0.001 | 1.0000 |
|  |  | s(Month) | 1.8119 | 2 | 9.291 | < 0.001 | 0.9897 |
|  |  | s(Lat, Lon) | 3.7762 | 4 | 17.131 | < 0.001 | 1.0000 |
|  | **Fixed Effects** |  |  |  |  |  |  |
|  |  | Target cluster |  |  |  |  | 0.9994 |
|  |  | Vessel |  |  |  |  | 1.0000 |
|  | **Summary stats** | **Deviance explained** | | **Num. observations** | |  |  |
|  |  | 84.80% |  | 4377 |  |  |  |
|  | | | | | | | |
| **Hammerheads (NPF)** | |  |  |  |  |  |  |
|  | **Coefficients** | **Term** | **Estimate** | **Std. Error** | **t value** | **Pr(>|t|)** | **Importance** |
|  |  | Intercept | -30.8618 | 24486.88 | -0.001 | 0.999 |  |
|  | **Smoothed terms** |  | **Est. df** | **Ref df** | ***F*** | ***P-*value** |  |
|  |  | s(Year) | 8.2671 | 8.7596 | 15.592 | < 0.001 | 0.9999 |
|  |  | s(Month) | 1.9164 | 2 | 19.151 | < 0.001 | 0.9999 |
|  |  | s(Lat, Lon) | 3.6897 | 4 | 19.478 | < 0.001 | 0.0001 |
|  |  | s(Depth) | 6.3773 | 7.3336 | 6.246 | < 0.001 | 1.0000 |
|  | **Fixed Effects** |  |  |  |  |  |  |
|  |  | Vessel |  |  |  |  | 1.0000 |
|  | **Summary stats** | **Deviance explained** | | **Num. observations** | |  |  |
|  |  | 95.40% |  | 4377 |  |  |  |
|  |  |  |  |  |  |  |  |
| **DEMERSAL LONGLINES (LLA)** | | | | | | | |
| **Shearwaters (LLA)** | |  |  |  |  |  |  |
|  | **Coefficients** | **Term** | **Estimate** | **Std. Error** | **t value** | **Pr(>|t|)** | **Importance** |
|  |  | Intercept | -7.4016 | 0.7819 | -9.466 | <2e-16 |  |
|  | **Smoothed terms** |  | **Est. df** | **Ref df** | ***F*** | ***P-*value** | **Importance** |
|  |  | s(Month) | 1.7652 | 2 | 14.247 | 0.002 | 0.9647 |
|  |  | s(Vessel) | 4.6623 | 16 | 1.058 | < 0.001 | 0.9835 |
|  | **Fixed Effects** |  |  |  |  |  |  |
|  | **Summary stats** | **Deviance explained** | | **Num. observations** | |  |  |
|  |  | 16.10% |  | 1987 |  |  |  |
|  |  |  |  |  |  |  |  |
| **Petrels (LLA)** | |  |  |  |  |  |  |
|  | **Coefficients** | **Term** | **Estimate** | **Std. Error** | **t value** | **Pr(>|t|)** | **Importance** |
|  |  | Intercept | -1.34E+02 | 8.10E+01 | -1.653 | 0.0985 |  |
|  |  | Target catch | -2.33E-03 | 9.33E-04 | -2.501 | 0.0125 | 0.4506 |
|  | **Smoothed terms** |  | **Est. df** | **Ref df** | ***F*** | ***P-*value** |  |
|  |  | s(Year) | 0.9543 | 9 | 3.998 | < 0.001 | 0.9998 |
|  |  | s(Lat, Lon) | 1.8205 | 2 | 24.457 | < 0.001 | 0.9959 |
|  |  | s(Depth) | 3.9711 | 9 | 4.056 | < 0.001 | 1.0000 |
|  |  | s(Vessel) | 5.0809 | 16 | 3.825 | < 0.001 | 1.0000 |
|  | **Fixed Effects** |  |  |  |  |  |  |
|  |  | Target cluster |  |  |  |  | 1.0000 |
|  | **Summary stats** | **Deviance explained** | | **Num. observations** | |  |  |
|  |  | 44.20% |  | 1987 |  |  |  |
|  |  |  |  |  |  |  |  |
| **Albatrosses (LLA)** | |  |  |  |  |  |  |
|  | **Coefficients** | **Term** | **Estimate** | **Std. Error** | **t value** | **Pr(>|t|)** | **Importance** |
|  |  | Intercept | -6.5939 | 0.8396 | -7.854 | 6.58E-15 |  |
|  | **Smoothed terms** |  | **Est. df** | **Ref df** | ***F*** | ***P-*value** |  |
|  |  | s(Year) | 1.3132 | 9 | 5.613 | < 0.001 | 0.9869 |
|  |  | s(Month) | 1.3614 | 2 | 2.489 | 0.045 | 0.7323 |
|  |  | s(Lat, Lon) | 1.8465 | 2 | 28.156 | < 0.001 | 0.8856 |
|  |  | s(Depth) | 2.1342 | 9 | 5.148 | 0.002 | 0.9371 |
|  |  | s(Vessel) | 6.8429 | 16 | 3.645 | < 0.001 | 1.0000 |
|  | **Fixed Effects** |  |  |  |  |  |  |
|  |  | Target cluster |  |  |  |  | 0.0285 |
|  | **Summary stats** | **Deviance explained** | | **Num. observations** | |  |  |
|  |  | 27% |  | 1987 |  |  |  |
|  |  |  |  |  |  |  |  |
| **OTTER BOTTOM TRAWL (OTB)** | | | | | | | |
| **Shearwaters (OTB)** | |  |  |  |  |  |  |
|  | **Coefficients** | **Term** | **Estimate** | **Std. Error** | **t value** | **Pr(>|t|)** | **Importance** |
|  |  | Intercept | -1.23E+01 | 1.58E+00 | -7.772 | 9.23E-15 |  |
|  |  | Target catch | 2.59E-04 | 3.51E-05 | 7.382 | 1.80E-13 | 1.0000 |
|  | **Smoothed terms** |  | **Est. df** | **Ref df** | ***F*** | ***P-*value** |  |
|  |  | s(Year) | 5.997 | 9 | 10.562 | < 0.001 | 1.0000 |
|  |  | s(Month) | 3.8623 | 10 | 6.581 | 0.009 | 0.6815 |
|  |  | s(Lat, Lon) | 1.3596 | 2 | 90.511 | 0.059 | 0.6507 |
|  |  | s(Vessel) | 22.4045 | 57 | 1.878 | < 0.001 | 1.0000 |
|  | **Fixed Effects** |  |  |  |  |  |  |
|  | **Summary stats** | **Deviance explained** | | **Num. observations** | |  |  |
|  |  | 66.80% |  | 5227 |  |  |  |
|  |  |  |  |  |  |  |  |
| **Pinnipeds (OTB)** | |  |  |  |  |  |  |
|  | **Coefficients** | **Term** | **Estimate** | **Std. Error** | **t value** | **Pr(>|t|)** | **Importance** |
|  |  | Intercept | -9.028192 | 0.440038 | -20.520 | <2e-16 |  |
|  |  | Target catch | 0.000245 | 2.41E-05 | 10.180 | <2e-16 | 1.0000 |
|  | **Smoothed terms** | **Term** | **Est. df** | **Ref df** | ***F*** | ***P-*value** |  |
|  |  | s(Month) | 2.7034 | 10 | 9.234 | < 0.001 | 0.9860 |
|  |  | s(Lat, Lon) | 1.8532 | 2 | 516.996 | < 0.001 | 0.9941 |
|  |  | s(dpth_min) | 0.8767 | 9 | 3.201 | 0.004 | 0.9766 |
|  |  | s(Vessel) | 31.7655 | 57 | 2.724 | < 0.001 | 1.0000 |
|  | **Fixed Effects** |  |  |  |  |  |  |
|  | **Summary stats** | **Deviance explained** | | **Num. observations** | |  |  |
|  |  | 46.30% |  | 5227 |  |  |  |
|  |  |  |  |  |  |  |  |
| **Petrels (OTB)** | |  |  |  |  |  |  |
|  | **Coefficients** | **Term** | **Estimate** | **Std. Error** | **t value** | **Pr(>|t|)** | **Importance** |
|  |  | Intercept | -9.67E+00 | 1.27E+00 | -7.645 | 2.48E-14 |  |
|  |  | Target catch | 2.54E-04 | 3.85E-05 | 6.604 | 4.40E-11 | 1.0000 |
|  | **Smoothed terms** |  | **Est. df** | **Ref df** | ***F*** | ***P-*value** |  |
|  |  | s(Year) | 5.2392 | 9 | 46.102 | < 0.001 | 1.0000 |
|  |  | s(Vessel) | 26.3911 | 57 | 2.375 | < 0.001 | 1.0000 |
|  | **Fixed Effects** |  |  |  |  |  |  |
|  | **Summary stats** | **Deviance explained** | | **Num. observations** | |  |  |
|  |  | 70.30% |  | 5227 |  |  |  |
|  |  |  |  |  |  |  |  |
| **Albatrosses (OTB)** | |  |  |  |  |  |  |
|  | **Coefficients** | **Term** | **Estimate** | **Std. Error** | **t value** | **Pr(>|t|)** | **Importance** |
|  |  | Intercept | -6.13E+00 | 4.90E-01 | -12.510 | <2e-16 |  |
|  |  | Target catch | 2.43E-04 | 2.40E-05 | 10.100 | <2e-16 | 1.0000 |
|  | **Smoothed terms** |  | **Est. df** | **Ref df** | ***F*** | ***P-*value** |  |
|  |  | s(Year) | 4.989 | 9 | 41.606 | < 0.001 | 1.0000 |
|  |  | s(Month) | 4.8035 | 10 | 11.341 | < 0.001 | 0.8462 |
|  |  | s(Depth) | 3.7249 | 9 | 7.847 | < 0.001 | 0.9801 |
|  |  | s(Vessel) | 29.1687 | 57 | 2.820 | < 0.001 | 1.0000 |
|  | **Fixed Effects** |  |  |  |  |  |  |
|  | **Summary stats** | **Deviance explained** | | **Num. observations** | |  |  |
|  |  | 51.30% |  | 5227 |  |  |  |
|  |  |  |  |  |  |  |  |
| **SET GILLNETS (GNS)** | | | | | | | |
| **Shearwaters (GNS)** | |  |  |  |  |  |  |
|  | **Coefficients** | **Term** | **Estimate** | **Std. Error** | **t value** | **Pr(>|t|)** | **Importance** |
|  |  | Intercept | -7.8705 | 0.5727 | -13.740 | <2e-16 |  |
|  | **Smoothed terms** |  | **Est. df** | **Ref df** | ***F*** | ***P-*value** |  |
|  |  | s(Year) | 0.565 | 9 | 0.144 | 0.12 | 0.5301 |
|  |  | s(Month) | 1.671 | 2 | 4.785 | 0.003 | 0.9421 |
|  |  | s(Lat, Lon) | 0.5504 | 2 | 0.548 | 0.14 | 0.4981 |
|  |  | s(Vessel) | 0 | 42 | 0.000 | 0.64 | 0.4880 |
|  | **Fixed Effects** |  |  |  |  |  |  |
|  | **Summary stats** | **Deviance explained** | | **Num. observations** | |  |  |
|  |  | 12% |  | 2115 |  |  |  |
|  |  |  |  |  |  |  |  |
| **Dolphins (GNS)** | |  |  |  |  |  |  |
|  | **Coefficients** | **Term** | **Estimate** | **Std. Error** | **t value** | **Pr(>|t|)** | **Importance** |
|  |  | Intercept | -19.97966 | 2.53933 | -7.868 | 5.72E-15 |  |
|  |  | Target catch | -0.04123 | 0.0137 | -3.010 | 0.00264 | 0.8492 |
|  | **Smoothed terms** |  | **Est. df** | **Ref df** | ***F*** | ***P-*value** |  |
|  |  | s(Year) | 0.7419 | 9 | 40.488 | 0.049 | 0.7946 |
|  |  | s(Lat, Lon) | 1.0618 | 2 | 247.512 | 0.012 | 0.8933 |
|  |  | s(Vessel) | 12.3574 | 42 | 1.176 | < 0.001 | 0.9938 |
|  | **Fixed Effects** |  |  |  |  |  |  |
|  | **Summary stats** | **Deviance explained** | | **Num. observations** | |  |  |
|  |  | 72.30% |  | 2115 |  |  |  |
|  |  |  |  |  |  |  |  |
| **Albatrosses (GNS)** | |  |  |  |  |  |  |
|  | **Coefficients** | **Term** | **Estimate** | **Std. Error** | **t value** | **Pr(>|t|)** | **Importance** |
|  |  | Intercept | -7.4155 | 0.5437 | -13.640 | <2e-16 |  |
|  | **Smoothed terms** |  | **Est. df** | **Ref df** | ***F*** | ***P-*value** |  |
|  |  | s(Lat, Lon) | 1.1383 | 2 | 10.939 | 0.003 | 0.6839 |
|  |  | s(Depth) | 0.9346 | 9 | 1.816 | 0.007 | 0.9041 |
|  |  | s(Vessel) | 12.3066 | 42 | 0.560 | 0.004 | 0.9564 |
|  | **Fixed Effects** |  |  |  |  |  |  |
|  | **Summary stats** | **Deviance explained** | | **Num. observations** | |  |  |
|  |  | 20% |  | 2115 |  |  |  |
